# Supplementary material for: An artificial enzyme of a polyoxometalate-supported cobalt complex for the oxidation of isochromans to isochromanones by activating O2
Source: Royal Society of Chemistry journal article supplement (doi:10.1039/d4qi00974f), 2024-01-01

## Supporting information

### **Artificial enzyme of polyoxometalate-supported cobalt complex for isochromans to isochromanones by activating O<sub>2</sub>**

Xiangyu Ren,<sup>a</sup> Hongrui Tian,<sup>a</sup> Baokuan Chen,<sup>\*a</sup> Lingling Dai,<sup>a</sup> Yanfeng Bi,<sup>\*a</sup> Guoping Yang,<sup>\*b</sup>

<sup>a</sup>*School of Petrochemical Engineering, Liaoning Petrochemical University, 113001, China.*

<sup>b</sup>*School of Chemistry, Biology and Material Science, Jiangxi Province Key Laboratory of*

*Synthetic Chemistry, Jiangxi Key Laboratory for Mass Spectrometry and Instrumentation, East*

*China University of Technology, Nanchang 330013, China*

*E-mail: [chenbaokuan@lnpu.edu.cn](mailto:chenbaokuan@lnpu.edu.cn) (B. K. Chen); [biyanfeng@lnpu.edu.cn](mailto:biyanfeng@lnpu.edu.cn) (Y. F. Bi);  
[erick@ecut.edu.cn](mailto:erick@ecut.edu.cn) (G. P. Yang)*

## **1 General Methods**

The compounds were obtained from commercial sources and can be used without further purification. The Powder X-ray diffraction (PXRD) was accomplished using Mo K $\alpha$  radiation ( $\lambda = 0.71073 \text{ \AA}$ ) on the Bruker D8 Advance diffractometer. The fourier transform infrared spectrum (FT-IR) spectra were recorded as the pressed KBr by Bruker ALPHA spectrometer. The thermal gravimetric analyses (TGA) were carried out using the TA Q600 thermal analyzer in a flowing N<sub>2</sub> atmosphere at a heating rate of 10 °C min<sup>-1</sup> from 25 to 900 °C. The X-ray photoelectron spectrum (XPS) tests were conducted using an ESCALAB 250Xi spectrometer and an Al K $\alpha$  radiation source (1486.7 eV) as the X-ray energy. <sup>1</sup>H nuclear magnetic resonance spectroscopy (<sup>1</sup>H NMR) spectra were obtained on Bruker AVANCE III 400 instrument.

## 2 Synthesis of Catalysts

Synthesis of  $[\text{Co}^{\text{II}}(\text{C}_7\text{H}_{12}\text{N}_2)_3][\text{Co}^{\text{II}}(\text{C}_7\text{H}_{12}\text{N}_2)_4]_2[\text{HPMo}^{\text{VI}}_4\text{Mo}^{\text{V}}_4\text{V}^{\text{V}}_4(\text{V}^{\text{IV}}\text{O})_2\text{O}_{40}] \cdot 3\text{H}_2\text{O}$  (**PMoV-Co**).  $\text{NH}_4\text{VO}_3$  (0.116 g, 1 mmol),  $\text{Co}(\text{NO}_3)_2 \cdot 6\text{H}_2\text{O}$  (0.145 g, 0.5 mmol),  $(\text{NH}_4)_2\text{MoO}_4$  (0.145 g, 0.73 mmol),  $\text{H}_3\text{PO}_3$  (0.5 mmol), 1-Butylimidazole (1 mL) and deionized water (10 mL) were contained in a 20 mL Teflon-lined reactor operating at autogenous pressure for 3 days at 140 °C. After cooling to room temperature, black massive crystals are formed. Yield: 49.3% (based on V). FT-IR (KBr,  $\text{cm}^{-1}$ ): 3439 (s), 3124 (m), 2956 (m), 2928 (m), 2874 (w), 1627 (m), 1519 (m), 1462 (w), 1374 (w), 1233 (m), 1092 (s), 1052 (w), 938 (vs), 790 (s), 658 (w), 530 (vw).

## 3 Single crystal X-ray diffraction

**PMoV-Co** single crystal data were acquired using Mo-K $\alpha$  radiation on a Bruker D8 QUEST system at 273 K. After being handled by utilizing the SQUEEZE function of PLATON,<sup>S1</sup> the structures were solved using the direct technique and refined using full-matrix least-squares on  $F^2$  using the olex 2.<sup>S2</sup> All non-hydrogen atoms were polished anisotropically without the use of lattice water. The hydrogen atoms of the organic ligand were trapped in their prescribed positions. Table S1 provides the crystal information and structural refinement parameters for the **PMoV-Co**. The CCDC number is 2343627.

## 4 Oxidation of Isochromans to Isochromanones

A typical reaction, isochroman (0.2 mmol), **PMoV-Co** (0.30 mol%), and 1,4-dioxane (2 mL) were put into a 10 mL Shrek tube with an oxygen balloon, which was

heated for 12 h at 80 °C. After the reaction, the catalyst is filtered and separated for use in cycling tests. The solution was purified via silica gel flash column chromatography, analyze the product by  $^1\text{H}$  NMR.

## 5 Characterization of compounds

For **PMoV-Co**, the weight loss during the first process between 25 and 100 °C is 2.01% (calcd 1.09%), a result of the **PMoV-Co** losing their isolated water. The weight loss of the second process between 200 and 600 °C is 39.62% (calcd 40.54%), attributed to the loss of 1-butylimidazole in the compounds. The weight loss between 700 and 900 °C was thought to be the cause of the collapse of the compound skeletons. The findings of the TG analysis indicated that the compound had thermal stability. (Fig. S1).

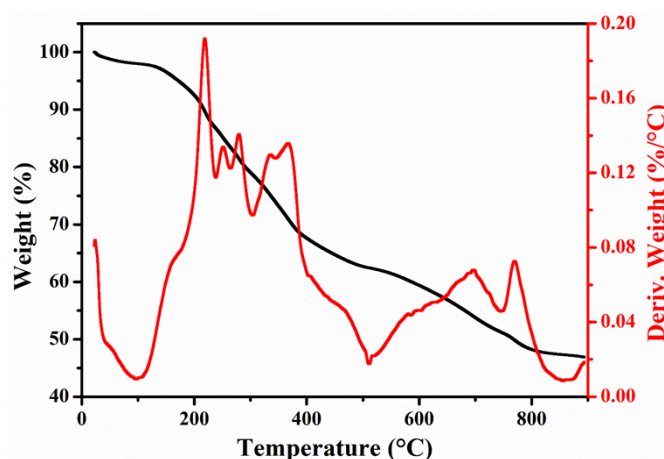

**Fig. S1** The TGA curve of **PMoV-Co**

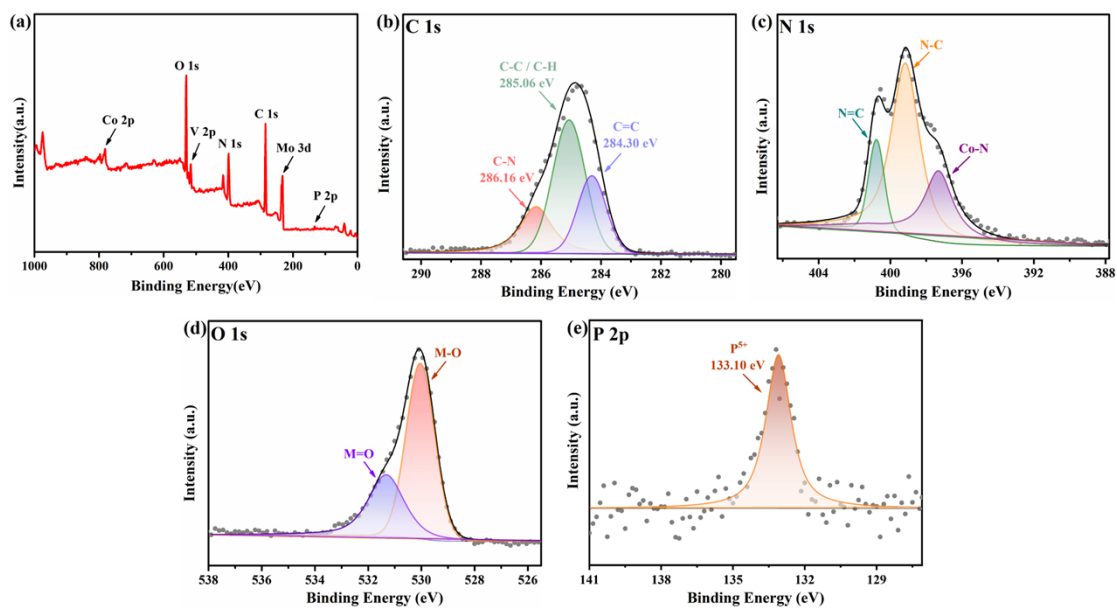

**Fig. S2** XPS spectra of **PMoV-Co**: (a) full-scan spectrum; (b) C 1s; (c) N 1s; (d) O 1s; (e) P 2p

## 6 Characterization of other catalysts as a comparison

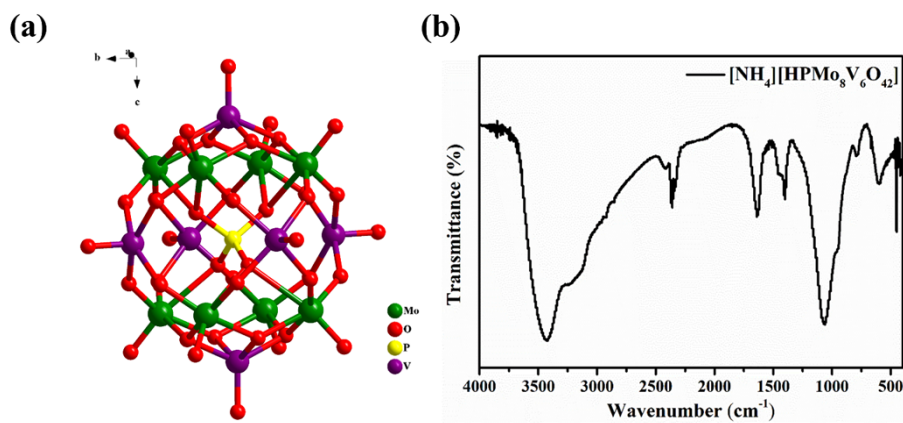

**Fig. S3** Ball-and-stick structure and FT-IR spectrum of  $[\text{NH}_4]_4[\text{HPMo}_8\text{V}_6\text{O}_{42}]$

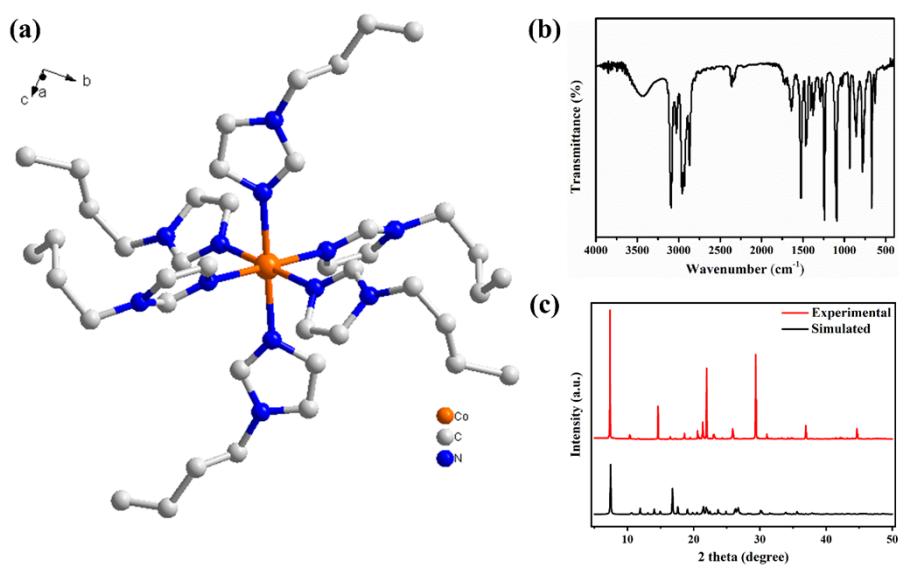

**Fig. S4** Ball-and-stick structure, FT-IR spectrum and PXRD of  $[\text{Co}(\text{C}_7\text{H}_{12}\text{N}_2)_6] \cdot 2\text{Cl}$

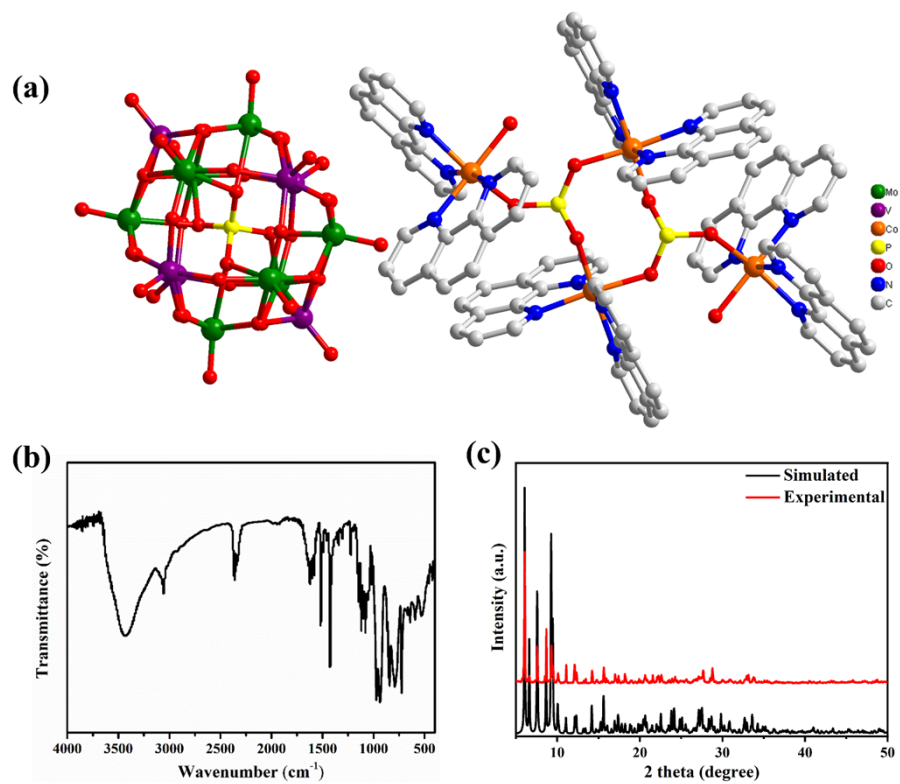

**Fig. S5** Ball-and-stick structure, FT-IR spectrum and PXRD of  $[\text{Co}_4(\text{phen})_8(\text{HPO}_3)_2][\text{PMo}_8\text{V}_6\text{O}_{42}]^{\text{S}3}$

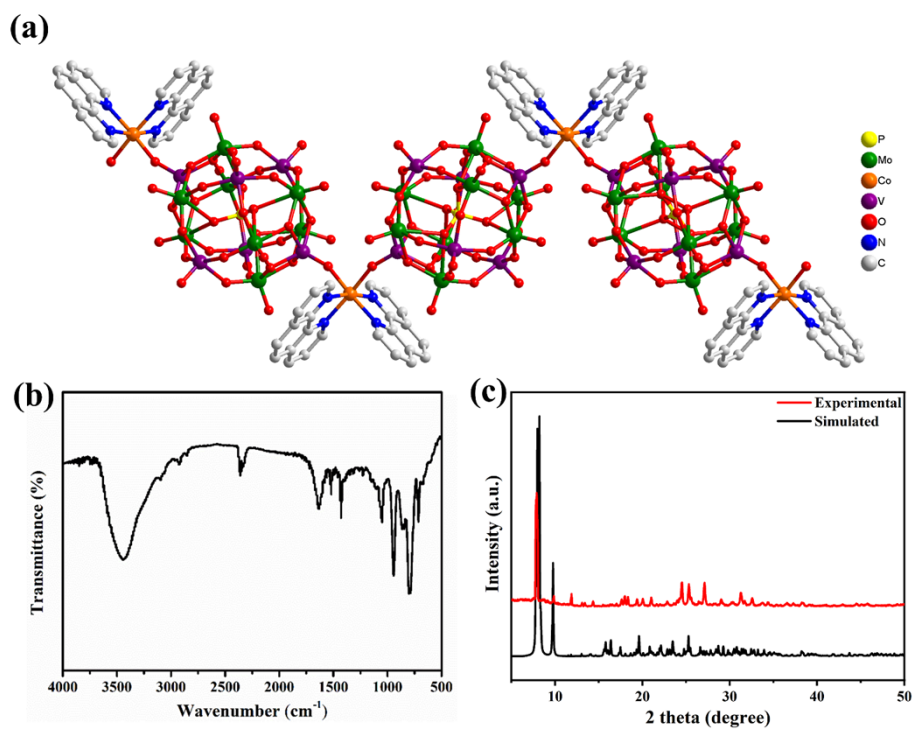

**Fig. S6** Ball-and-stick structure, FT-IR spectrum and PXRD of  $[\text{PMo}_8\text{V}_6\text{O}_{42}][\text{Co}(\text{Phen})_2][\text{Hpy}]^{\text{S4}}$

## 7 Leaching test (supplement)

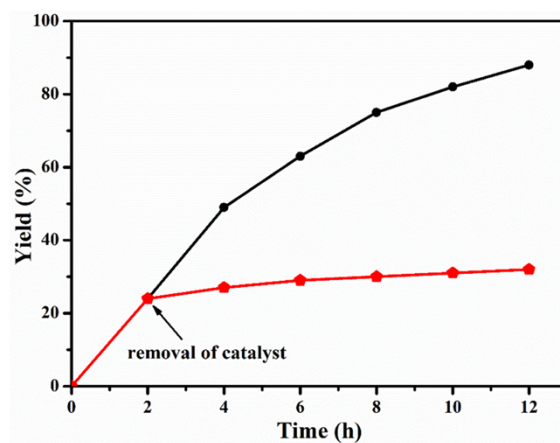

**Fig. S7** The heterogeneity test of **PMoV-Co**

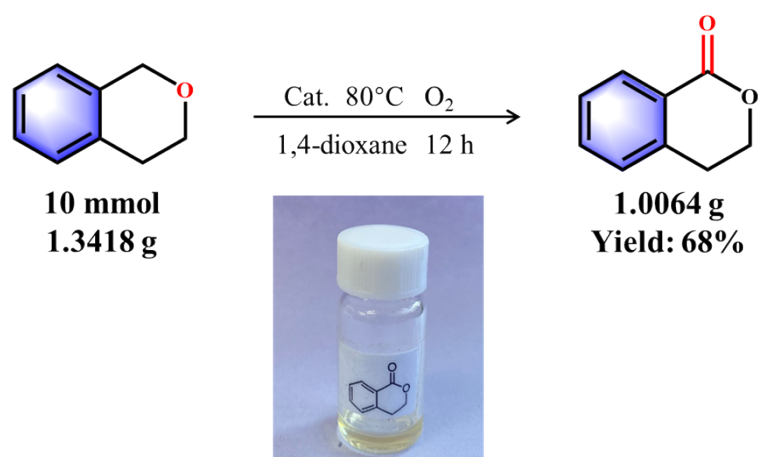

**Fig S8.** Isochromanone gram scale preparation

### 8 Radical capture experiment (supplement)

Isochroman (0.2 mmol), **PMoV-Co** (0.003 mmol), (2,2,6,6-tetramethylpiperidin-1-yl)oxidanyl (TEMPO) (2 equiv.) and 1,4-dioxane (2 mL) was put into a 10 mL Shrek tube with an oxygen balloon, which was heated for 12 h at 80 °C. After the reaction, product 3a was obtained and characterized by <sup>1</sup>H NMR (Fig. S9).<sup>S5</sup>

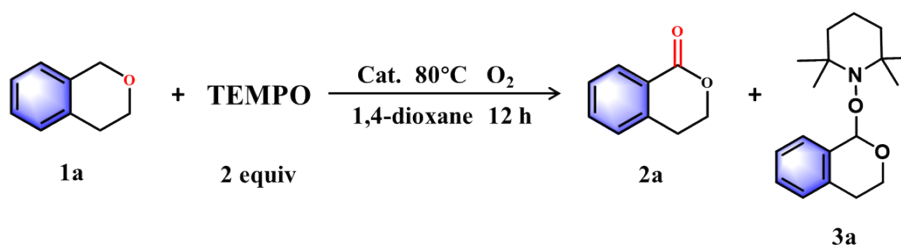

**Fig. S9** Radical scavenger experiment of TEMPO

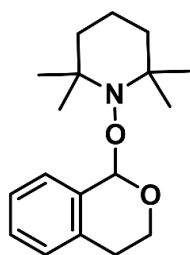

**3a**, yellowish solid.  $^1\text{H}$  NMR (400 MHz,  $\text{CDCl}_3$ )  $\delta$  7.65 (d,  $J = 7.2$  Hz, 1H), 7.27-7.24 (m, 3H), 7.17-7.15 (m, 1H), 6.00 (s, 1H), 4.05-3.98 (m, 1H), 3.89-3.85 (m, 1H), 2.95-2.90 (m, 1H), 2.69-2.65 (m, 1H), 1.57-1.42 (m, 9H), 1.29 (s, 6H), 1.10 (s, 3H).

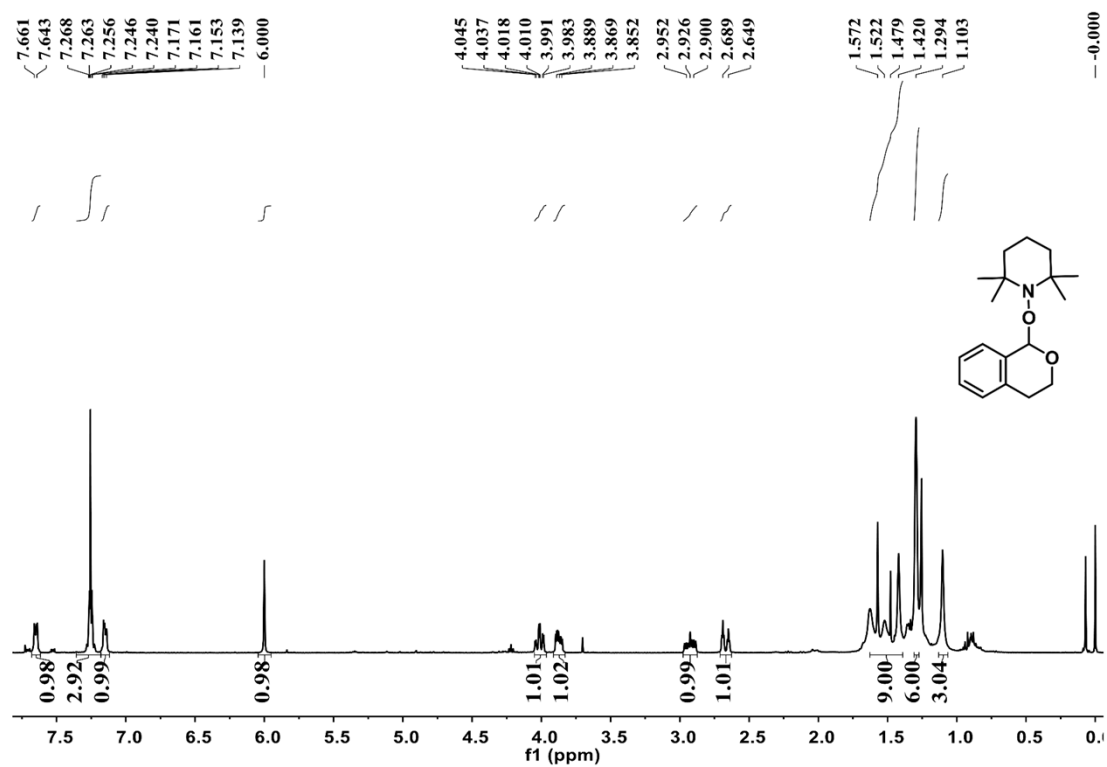



## 9 Catalyst characterization after cycle

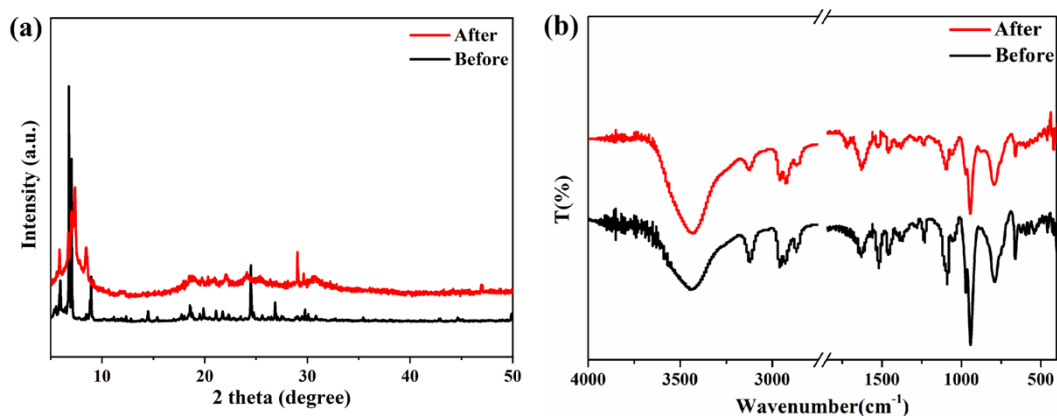

Fig. S10 PXRD patterns and FT-IR for catalyst before and after reaction

From the high resolution of the elements in Fig. S11, it can be seen that the valence states of various elements remain unchanged before and after the photocatalytic cycle reaction of **PMoV-Co**, which proves the stability of the crystal structure of **PMoV-Co**.

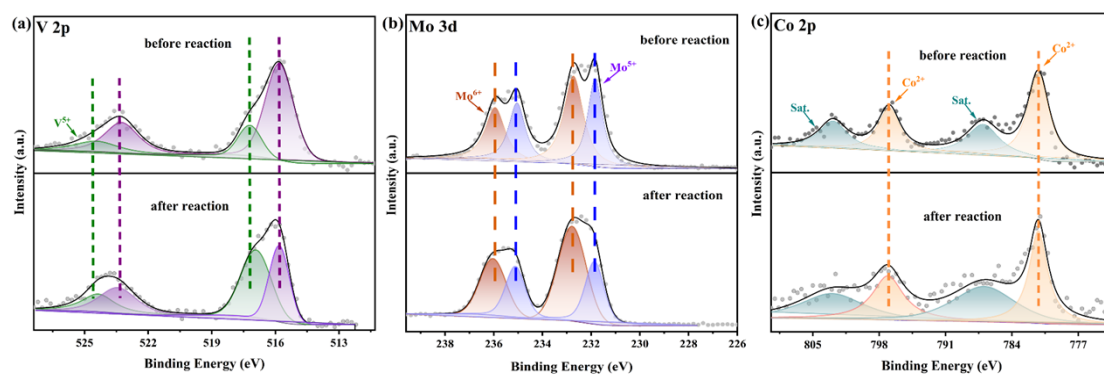

Fig. S11 XPS patterns for catalyst before and after reaction: (a) V 2p; (b) Mo 3d; (c) Co 2p

**Table S1 Crystal data**

| Compounds                                                         | PMoV-Co                                                                                                          |
|-------------------------------------------------------------------|------------------------------------------------------------------------------------------------------------------|
| Formula                                                           | C <sub>77</sub> H <sub>140</sub> Co <sub>3</sub> Mo <sub>8</sub> N <sub>22</sub> O <sub>46</sub> PV <sub>6</sub> |
| Formula weight (g·mol <sup>-1</sup> )                             | 3316.93                                                                                                          |
| Crystal                                                           | Monoclinic                                                                                                       |
| Space group                                                       | <i>C2/c</i>                                                                                                      |
| <i>T</i> (K)                                                      | 273                                                                                                              |
| <i>a</i> (Å)                                                      | 14.5907 (6)                                                                                                      |
| <i>b</i> (Å)                                                      | 26.2303 (11)                                                                                                     |
| <i>c</i> (Å)                                                      | 30.8162 (13)                                                                                                     |
| <i>α</i> (°)                                                      | 90                                                                                                               |
| <i>β</i> (°)                                                      | 100.22(4)                                                                                                        |
| <i>γ</i> (°)                                                      | 90                                                                                                               |
| Volume (Å <sup>3</sup> )                                          | 11606.8 (8)                                                                                                      |
| <i>Z</i>                                                          | 4                                                                                                                |
| <i>D<sub>c</sub></i> (g/cm <sup>3</sup> )                         | 1.897                                                                                                            |
| <i>μ</i> (mm <sup>-1</sup> )                                      | 1.81                                                                                                             |
| Reflections collected                                             | 10292                                                                                                            |
| Unique data                                                       | 1674                                                                                                             |
| <i>R<sub>int</sub></i>                                            | 0.043                                                                                                            |
| <i>GOF on F<sup>2</sup></i>                                       | 1.009                                                                                                            |
| <i>R</i> <sub>1</sub> <sup>a</sup>                                | <i>R</i> <sub>1</sub> = 0.0715                                                                                   |
| w <i>R</i> <sub>2</sub> <sup>b</sup> [ <i>I</i> > 2σ( <i>I</i> )] | w <i>R</i> <sub>2</sub> = 0.1874                                                                                 |

[a]  $R_1 = \sum ||F_o| - |F_c|| / \sum |F_o|$ ; w*R*<sub>2</sub> =  $\{ \sum [w(F_o^2 - F_c^2)^2] / \sum [w(F_o^2)^2] \}^{1/2}$

**Table S2. Bond valence sum calculations of PMoV-Co<sup>S6</sup>**

| Atom       | Bond                     | Distance / Å | Bond Valence | Bond Valence Sum (BVS) |
|------------|--------------------------|--------------|--------------|------------------------|
| <b>Mo1</b> | Mo01 - O20               | 1.669 (7)    | 1.798        | 4.829                  |
|            | Mo01 - O18               | 1.782 (7)    | 1.325        |                        |
|            | Mo01 - O8                | 2.04 (7)     | 0.660        |                        |
|            | Mo01 - O9                | 2.06 (7)     | 0.625        |                        |
|            | Mo01 - O3                | 2.435 (14)   | 0.227        |                        |
|            | Mo01 - O6 <sup>ii</sup>  | 2.489 (12)   | 0.196        |                        |
| <b>Mo2</b> | Mo02 - O13               | 1.670 (7)    | 1.793        | 4.803                  |
|            | Mo02 - O4                | 1.786 (8)    | 1.310        |                        |
|            | Mo02 - O14               | 2.041 (7)    | 0.658        |                        |
|            | Mo02 - O9                | 2.064 (7)    | 0.618        |                        |
|            | Mo02 - O7 <sup>ii</sup>  | 2.418 (13)   | 0.237        |                        |
|            | Mo02 - O6 <sup>ii</sup>  | 2.507 (12)   | 0.187        |                        |
| <b>Mo3</b> | Mo03 - O15               | 1.668 (6)    | 0.223        | 5.913                  |
|            | Mo03 - O5                | 1.780 (8)    | 1.332        |                        |
|            | Mo03 - O21               | 1.793 (7)    | 0.630        |                        |
|            | Mo03 - O17               | 2.051 (7)    | 1.803        |                        |
|            | Mo03 - O8                | 2.057 (7)    | 0.640        |                        |
|            | Mo03 - O2 <sup>ii</sup>  | 2.441 (12)   | 1.286        |                        |
| <b>Mo4</b> | Mo04 - O12               | 1.659 (6)    | 1.847        | 5.941                  |
|            | Mo04 - O23               | 1.784 (8)    | 1.317        |                        |
|            | Mo04 - O1                | 1.788 (8)    | 1.303        |                        |
|            | Mo04 - O17 <sup>ii</sup> | 2.046 (7)    | 0.649        |                        |
|            | Mo04 - O14 <sup>ii</sup> | 2.059 (7)    | 0.627        |                        |
|            | Mo04 - O2                | 2.485 (13)   | 0.198        |                        |
| <hr/>      |                          |              |              |                        |
| <b>Co1</b> | Co1 - N9                 | 2.029 (8)    | 0.600        | 2.499                  |
|            | Co1 - N9i                | 2.029 (8)    | 0.600        |                        |
|            | Co1 - N9i                | 2.029 (8)    | 0.600        |                        |
|            | Co1 - O11i               | 2.081 (6)    | 0.349        |                        |
|            | Co1 - O11                | 2.081 (6)    | 0.349        |                        |
| <b>Co2</b> | Co2 - N7                 | 1.994 (9)    | 0.656        | 2.472                  |
|            | Co2 - N1                 | 2.017 (8)    | 0.620        |                        |
|            | Co2 - N5                 | 2.050 (9)    | 0.567        |                        |
|            | Co2 - N3                 | 2.123 (9)    | 0.465        |                        |
|            | Co2 - O10                | 2.362 (7)    | 0.164        |                        |

| Atom | Bond     | Distance / Å | Bond Valence | Bond Valence Sum (BVS) |
|------|----------|--------------|--------------|------------------------|
| V1   | V1 - O1  | 1.902 (8)    | 0.765        | 4.694                  |
|      | V1 - O5  | 1.915 (8)    | 0.739        |                        |
|      | V1 - O10 | 1.599 (7)    | 1.736        |                        |
|      | V1 - O18 | 1.920 (7)    | 0.729        |                        |
|      | V1 - O19 | 1.922 (7)    | 0.725        |                        |
| V2   | V2 - O17 | 1.922 (7)    | 0.725        | 4.482                  |
|      | V2 - O8  | 1.919 (7)    | 0.731        |                        |
|      | V2 - O9  | 1.919 (7)    | 0.731        |                        |
|      | V2 - O11 | 1.638 (6)    | 1.562        |                        |
|      | V2 - O14 | 1.918 (7)    | 0.733        |                        |
| V3   | V3 - O16 | 1.565 (7)    | 1.903        | 4.958                  |
|      | V3 - O4  | 1.906 (8)    | 0.757        |                        |
|      | V3 - O21 | 1.904 (7)    | 0.761        |                        |
|      | V3 - O22 | 1.906 (8)    | 0.757        |                        |
|      | V3 - O23 | 1.895 (7)    | 0.780        |                        |

Symmetry transformations used to generate equivalent atoms: i: x, y, 1/2-z

## Reference

- S1. Bruker, A. X. S. Inc., APEX3 Package, APEX3, SAINT and SADABS, Madison, Wisconsin, USA, 2016.
- S2. (a) O. V. Dolomanov, L. J. Bourhis, R. J. Gildea, J. A. K. Howard and H. Puschmann, OLEX2: A complete structure solution, refinement and analysis program. *J. Appl. Cryst.*, 2009, **42**, 339-341; (b) G. M. Sheldrick, SHELXT-Integrated space-group and crystal-structure determination. *Acta Cryst.*, 2015, **A71**, 3-8.
- S3. S. Y. Shi, Y. C. Zou, X. B. Cui, J. N. Xu, Y. Wang, G. W. Wang, G. D. Yang, J. Q. Xu, T. G. Wang and Z. M. Gao, 0D and 1D dimensional structures based on the combination of polyoxometalates, transition metal coordination complexes and organic amines, *CrystEngComm*, 2010, **12**, 2122-2128.
- S4. M. Yuan, Y. G. Li, E. B. Wang, Y. Lu, C. W. Hu, H. N. Hu and H. Q. Jia, Hydrothermal synthesis and crystal structure of a hybrid material based on  $[\text{Co}_4(\text{phen})_8(\text{H}_2\text{O})_2(\text{HPO}_3)_2]^{4+}$  and a highly reduced polyoxoanion, *J. Chem. Soc. Dalton Trans.*, 2002, 2916-2920.
- S5. Z. G. Yan, C. Jin, B. Sun and W. K. Su, (Diacetoxyiodo)benzene-Mediated Transition-Metal-Free Amination of  $\text{C}(\text{sp}^3)$  -H Bonds Adjacent to Heteroatoms with Azoles: Synthesis of N-Alkylated Azoles, *Synlett*, 2018, **29**, 2432-2436.
- S6. N. E. Brese, M. O'Keeffe, *Acta Crystallogr. Sect. B*, 1991, **47**, 192-197.

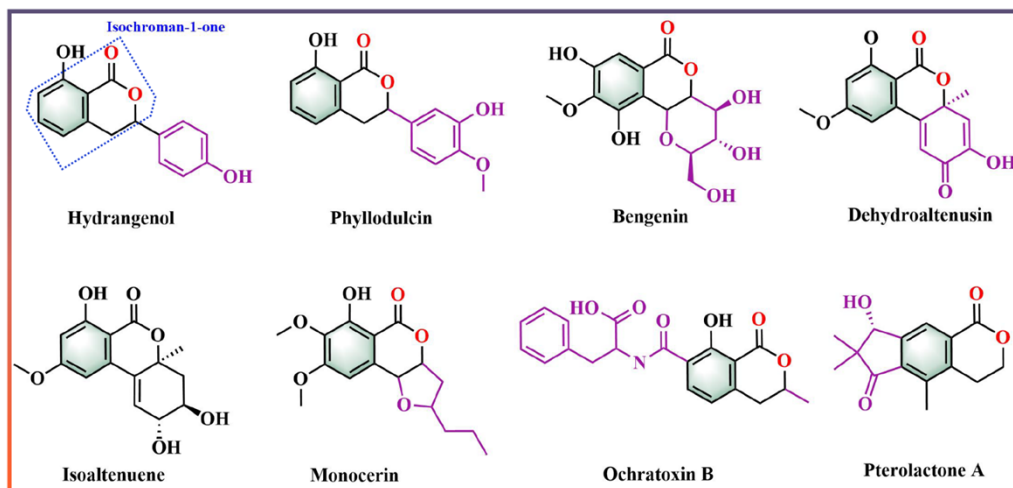

**Scheme S1** Representative naturally occurring isochromanones.

**Table S3 Optimization of the Reaction Conditions<sup>a</sup>**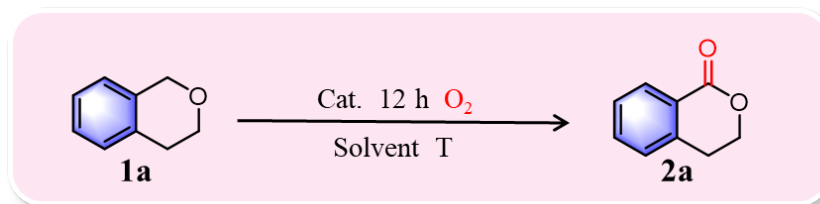

| entry | catalyst (mol%) | solvent                            | temperature (°C) | yield (%) <sup>b</sup> |
|-------|-----------------|------------------------------------|------------------|------------------------|
| 1     | none            | 1,4-dioxane                        | 80               | 21                     |
| 2     | PMoV-Co (0.15)  | 1,4-dioxane                        | 80               | 53                     |
| 3     | PMoV-Co (0.30)  | 1,4-dioxane                        | 80               | 88                     |
| 4     | PMoV-Co (0.45)  | 1,4-dioxane                        | 80               | 90                     |
| 5     | PMoV-Co (0.60)  | 1,4-dioxane                        | 80               | 89                     |
| 6     | PMoV-Co (0.30)  | 1,4-dioxane                        | 40               | 36                     |
| 7     | PMoV-Co (0.30)  | 1,4-dioxane                        | 60               | 63                     |
| 8     | PMoV-Co (0.30)  | 1,4-dioxane                        | 80               | 92(88) <sup>c</sup>    |
| 9     | PMoV-Co (0.30)  | 1,4-dioxane                        | 100              | 72                     |
| 10    | PMoV-Co (0.30)  | CH <sub>3</sub> OH                 | 80               | Trace                  |
| 11    | PMoV-Co (0.30)  | CH <sub>3</sub> CH <sub>2</sub> OH | 80               | 3                      |
| 12    | PMoV-Co (0.30)  | H <sub>2</sub> O                   | 80               | 19                     |
| 13    | PMoV-Co (0.30)  | CH <sub>3</sub> CN                 | 80               | 37                     |
| 14    | PMoV-Co (0.30)  | DMF                                | 80               | Trace                  |
| 15    | PMoV-Co (0.30)  | DMSO                               | 80               | 8                      |
| 16    | PMoV-Co (0.30)  | DCM                                | 80               | 55                     |

<sup>a</sup> Reaction conditions: **1a** (0.2 mmol), catalyst, solvent (2 mL), O<sub>2</sub> balloon, 12h. <sup>b</sup> Yields determined by <sup>1</sup>H NMR analysis using CH<sub>2</sub>Br<sub>2</sub> as an internal standard. <sup>c</sup> isolated yield.

## 8 Characterization of the products

### Isochroman-1-one (2a)

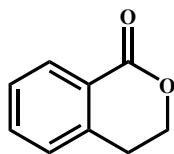

Yield 88%, yellow liquid.  $^1\text{H NMR}$  (400 MHz,  $\text{CDCl}_3$ )  $\delta$  8.10 (d,  $J = 8.0$  Hz, 1H), 7.54 (t,  $J = 8.0$  Hz, 1H), 7.40 (t,  $J = 8.0$  Hz, 1H), 7.27 (d,  $J = 8.0$  Hz, 1H), 4.54 (t,  $J = 8.0$  Hz, 2H), 3.04 (t,  $J = 6.0$  Hz, 2H).

### 7-Fluoroisochroman-1-one (2b)

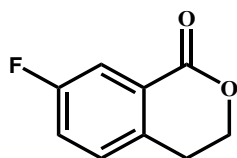

Yield 71%, white solid.  $^1\text{H NMR}$  (400 MHz,  $\text{CDCl}_3$ )  $\delta$  7.83 (d,  $J = 9.2$  Hz, 1H), 7.27-7.25 (m, 2H), 4.54 (t,  $J = 6.0$  Hz, 2H), 3.04 (t,  $J = 6.0$  Hz, 2H).

### 7-Chloroisochroman-1-one (2c)

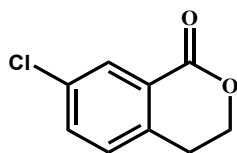

Yield 73%, white solid.  $^1\text{H NMR}$  (400 MHz,  $\text{CDCl}_3$ )  $\delta$  8.09 (d,  $J = 2.4$  Hz, 1H), 7.51 (d,  $J = 8.4$  Hz, 2H), 4.54 (t,  $J = 6.0$  Hz, 2H), 3.04 (t,  $J = 6.0$  Hz, 2H).

### 7-Bromoisochroman-1-one (2d)

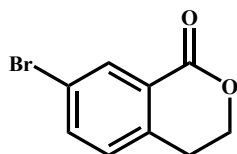

Yield 84%, white solid.  $^1\text{H NMR}$  (400 MHz,  $\text{CDCl}_3$ )  $\delta$  8.22 (d,  $J = 2.4$  Hz, 1H), 7.66 (dd,  $J = 8.0$  Hz,  $J = 2.0$  Hz, 1H), 7.17 (d,  $J = 8.0$  Hz, 1H), 4.54 (t,  $J = 6.0$  Hz, 2H), 3.03 (t,  $J = 6.0$  Hz, 2H).



### 6-Bromoisochroman-1-one (2e)

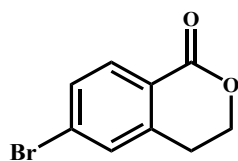

Yield 87%, white solid.  $^1\text{H NMR}$  (400 MHz,  $\text{CDCl}_3$ )  $\delta$  7.94 (d,  $J = 8.4$  Hz, 1H), 7.53 (d,  $J = 8.4$  Hz, 1H), 7.85 (d,  $J = 8.0$  Hz, 1H), 7.44 (s, 1H), 4.53 (t,  $J = 6.0$  Hz, 2H), 3.04 (t,  $J = 6.0$  Hz, 2H).

### 8-Bromoisochroman-1-one (2f)

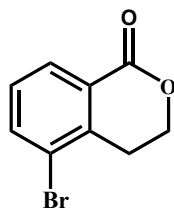

Yield 84%, white solid.  $^1\text{H NMR}$  (400 MHz,  $\text{CDCl}_3$ )  $\delta$  8.09 (d,  $J = 8.0$  Hz, 1H), 7.78 (d,  $J = 8.0$  Hz, 1H), 7.29 (t,  $J = 8.0$  Hz, 1H), 4.55 (t,  $J = 6.0$  Hz, 2H), 3.15 (t,  $J = 8.0$  Hz, 2H).

### 7-Methylisochroman-1-one (2g)

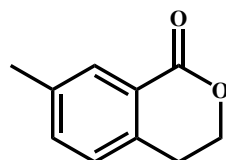

Yield 73%, white solid.  $^1\text{H NMR}$  (400 MHz,  $\text{CDCl}_3$ )  $\delta$  7.91 (s, 1H), 7.34 (d,  $J = 8.0$  Hz, 1H), 7.15 (d,  $J = 8.0$  Hz, 1H), 4.51 (t,  $J = 6.0$  Hz, 2H), 3.01 (t,  $J = 6.0$  Hz, 2H), 2.38 (s, 3H).

### 8-Methylisochroman-1-one (2h)

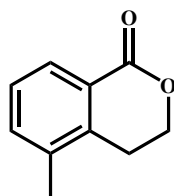

Yield 91%, white solid.  $^1\text{H NMR}$  (400 MHz,  $\text{CDCl}_3$ )  $\delta$  7.97 (d,  $J = 8.0$  Hz, 1H), 7.40 (d,  $J = 8.0$  Hz, 1H), 7.28 (t,  $J = 6.4$  Hz, 1H), 4.52 (t,  $J = 6.0$  Hz, 2H), 2.95 (t,  $J = 6.0$  Hz, 2H).

### 7-(Tert-butyl)isochroman-1-one (2i)

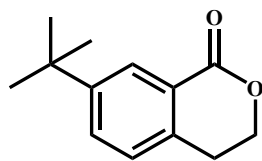

Yield 75%, white solid.  $^1\text{H NMR}$  (400 MHz,  $\text{CDCl}_3$ )  $\delta$  8.13 (d,  $J = 2.4$  Hz, 1H), 7.58 (dd,  $J = 8.0$  Hz, 2.4 Hz, 1H), 7.20 (d,  $J = 8.0$  Hz, 1H), 4.52 (t,  $J = 6.0$  Hz, 2H), 3.03 (t,  $J = 6.0$  Hz, 2H), 1.34 (s, 9H).

### 4-Methylisochroman-1-one (2j)

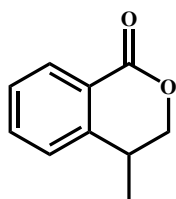

Yield 80%, colorless liquid.  $^1\text{H NMR}$  (400 MHz,  $\text{CDCl}_3$ )  $\delta$  8.11 (d,  $J = 8.0$  Hz, 1H), 7.58 (t,  $J = 8.0$  Hz, 1H), 7.40 (t,  $J = 8.0$  Hz, 1H), 7.30 (d,  $J = 8.0$  Hz, 1H), 4.53 (dd,  $J = 10.8$  Hz, 4.0 Hz, 1H), 4.25 (dd,  $J = 10.8$  Hz, 6.4 Hz, 1H), 3.19-3.15 (m, 1H), 1.38 (d,  $J = 8.0$  Hz, 3H).

### 3-Methylisochroman-1-one (2k)

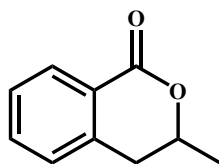

Yield 74%, colorless liquid.  $^1\text{H NMR}$  (400 MHz,  $\text{CDCl}_3$ )  $\delta$  8.10 (d,  $J = 8.0$  Hz, 1H), 7.53 (t,  $J = 8.0$  Hz, 1H), 7.39 (t,  $J = 8.0$  Hz, 1H), 7.24 (d,  $J = 8.0$  Hz, 1H), 4.73-4.65 (m, 1H), 2.99-2.89 (m, 2H), 1.53 (d,  $J = 8.0$  Hz, 3H).

### Isobenzofuran-1(3H)-one (2l)

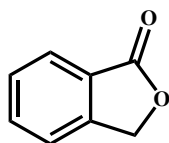

Yield 80%, colorless liquid.  $^1\text{H NMR}$  (400 MHz,  $\text{CDCl}_3$ )  $\delta$  7.94 (d,  $J = 7.6$  Hz, 1H), 7.69 (t,  $J = 6.0$  Hz, 1H), 7.55 (t,  $J = 7.6$  Hz, 1H), 7.50 (d,  $J = 6.0$  Hz, 1H), 5.33 (s, 2H).

### 1,2-Dihydro-4H-benzo[f]isochromen-4-one (2m)

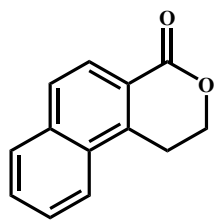

Yield 71%, white solid.  $^1\text{H NMR}$  (400 MHz,  $\text{CDCl}_3$ )  $\delta$  8.13 (d,  $J = 8.0$  Hz, 1H), 8.04 (d,  $J = 8.0$  Hz, 1H), 7.85 (d,  $J = 8.0$  Hz, 1H), 7.83 (d,  $J = 8.4$  Hz, 1H), 7.67-7.61 (m, 2H), 4.68 (t,  $J = 6.0$  Hz, 2H), 3.45 (t,  $J = 6.0$  Hz, 2H).

## 9 <sup>1</sup>H NMR spectra

### Isochroman-1-one (2a)

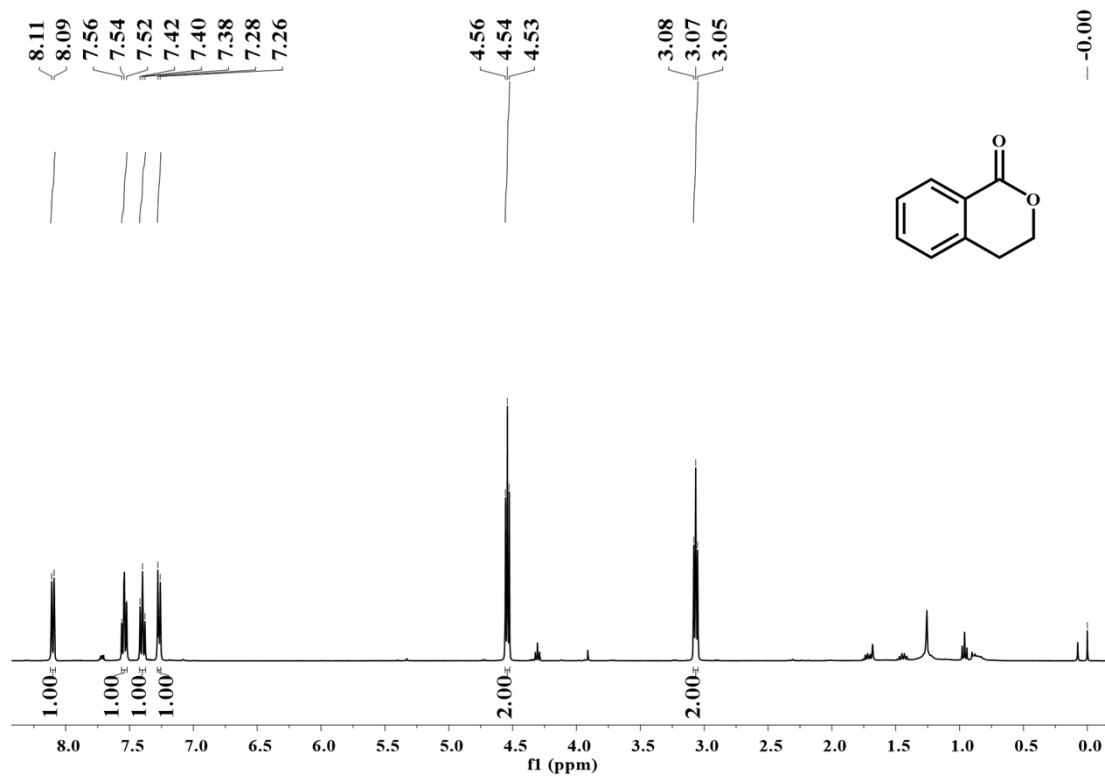

### 7-Fluoroisochroman-1-one (2b)

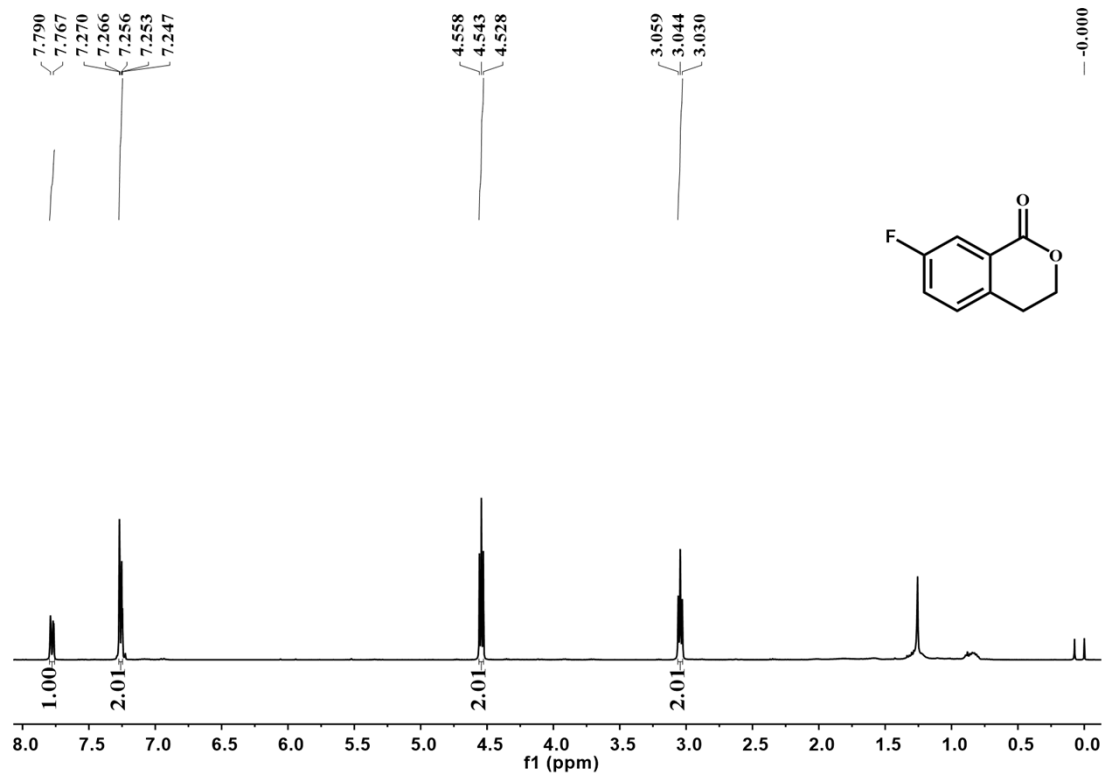

### 7-Fluoroisochroman-1-one (2c)

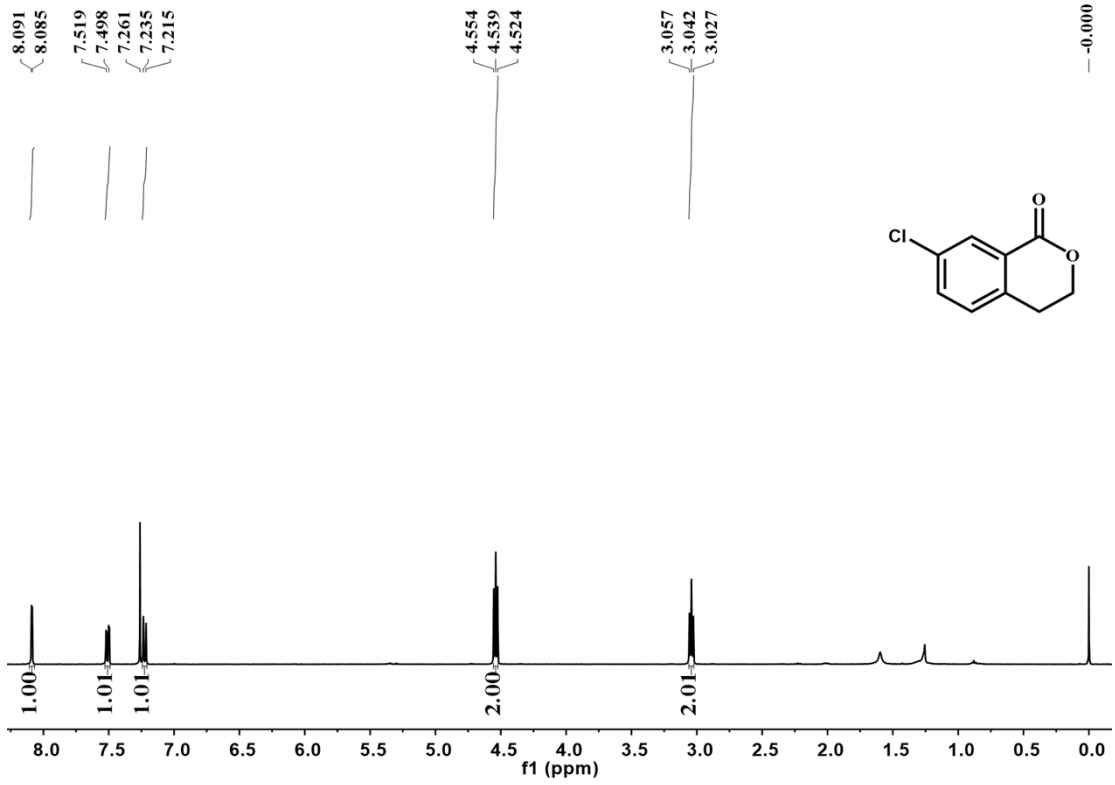

### 7-Bromoisochroman-1-one (2d)

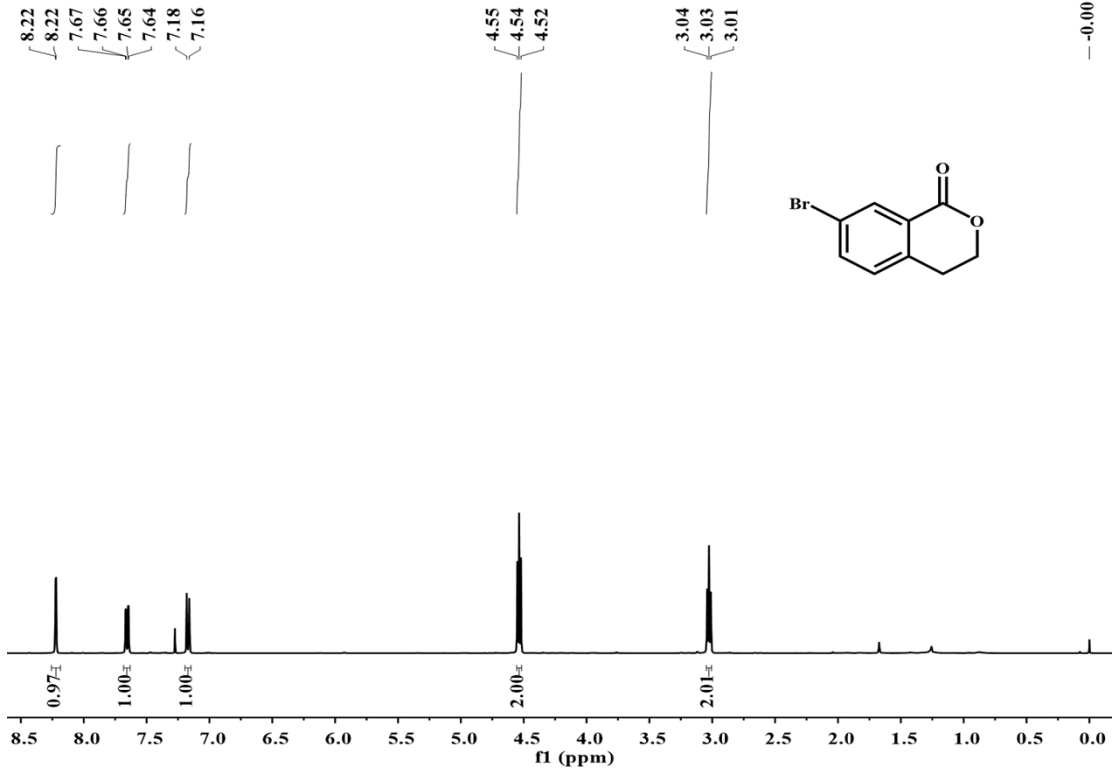

### 6-Bromoisochroman-1-one (2e)

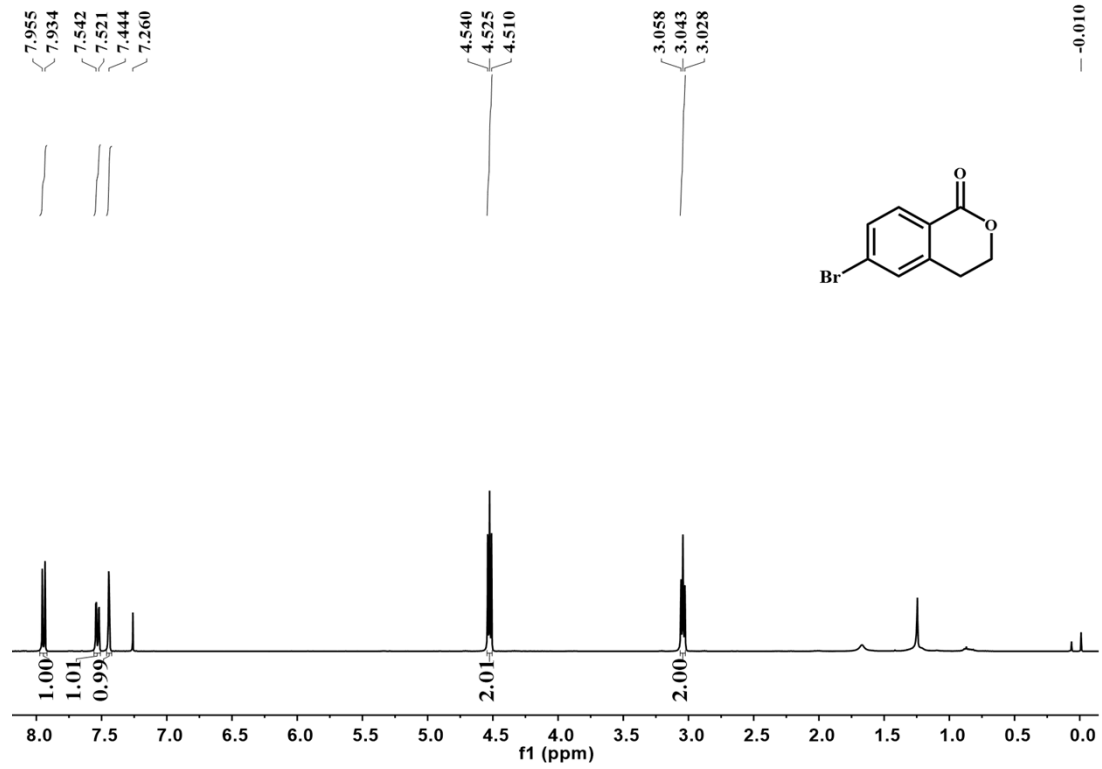

### 8-Bromoisochroman-1-one (2f)

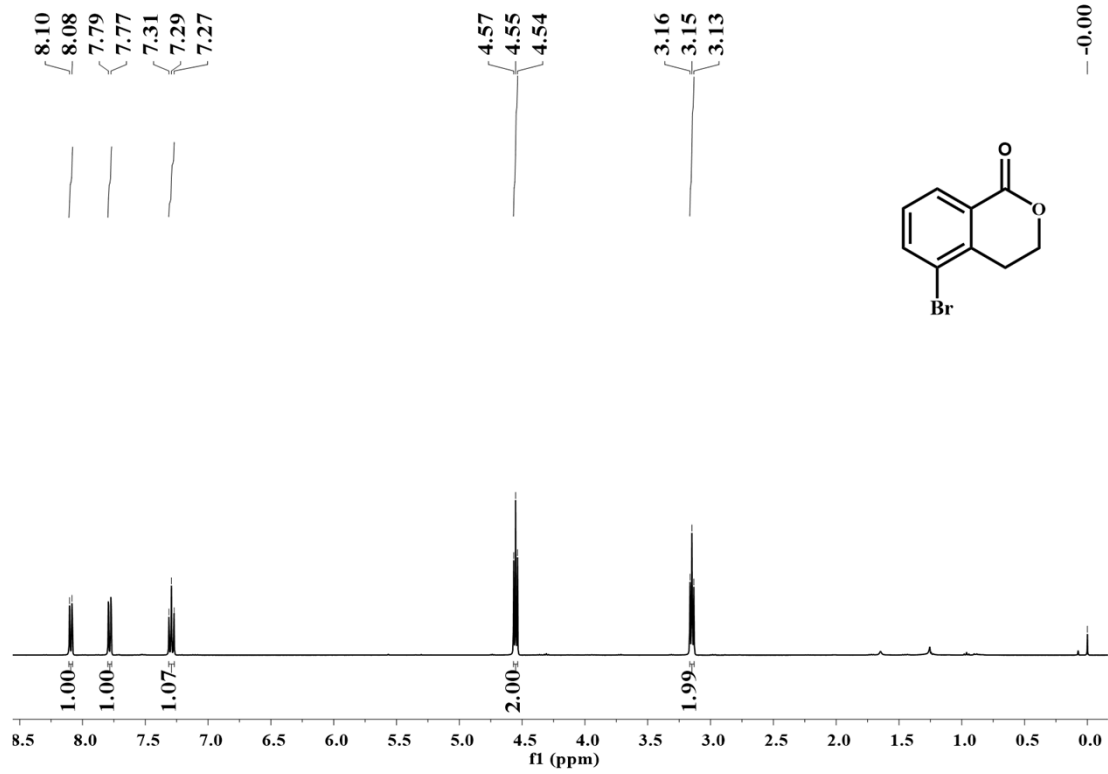

### 7-Methylisochroman-1-one (2g)

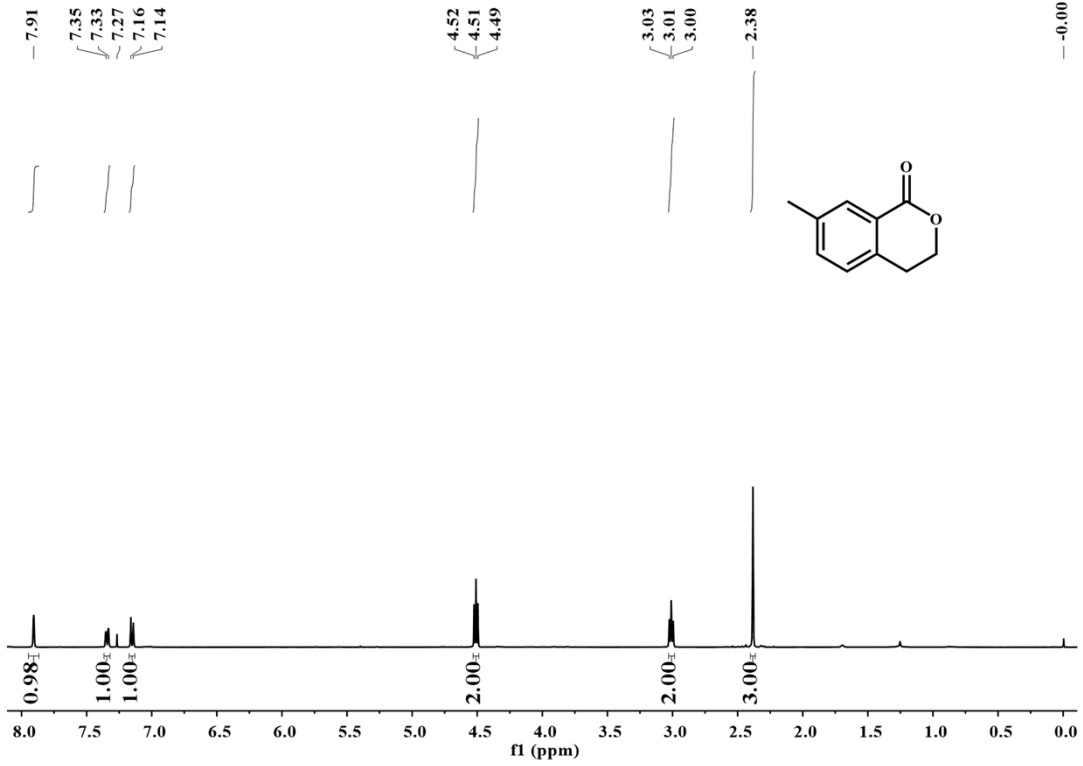

### 8-Methylisochroman-1-one (2h)

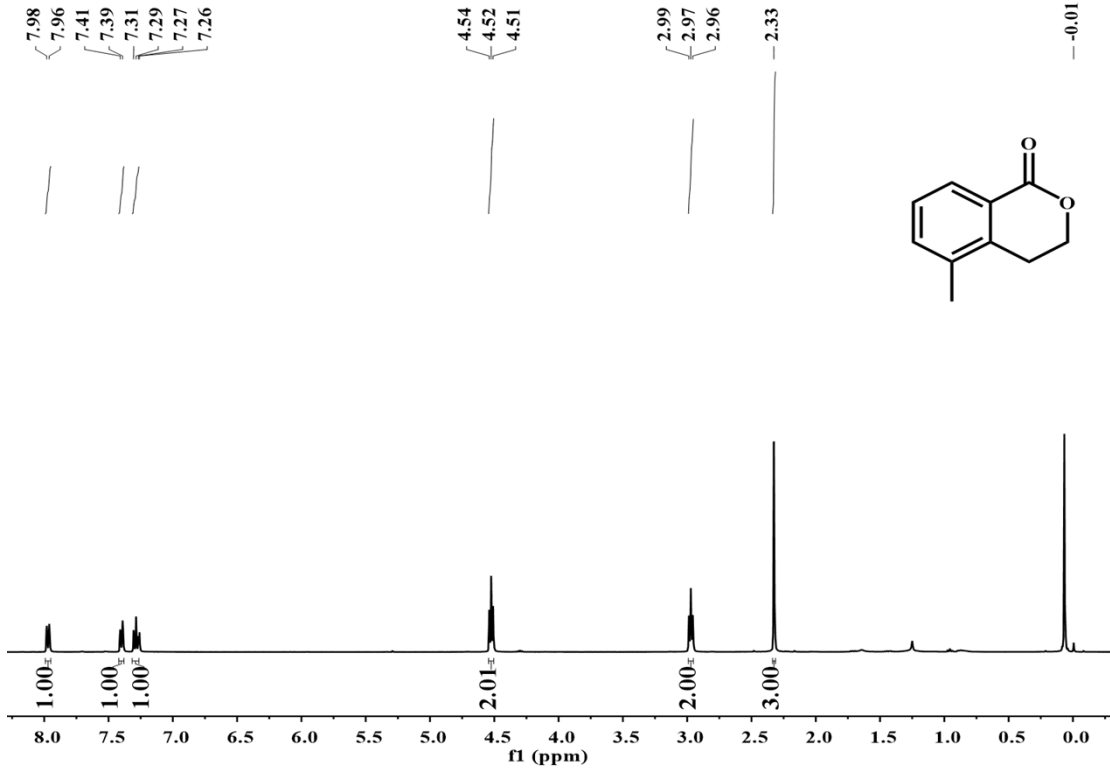

### 7-(Tert-butyl)isochroman-1-one (2i)

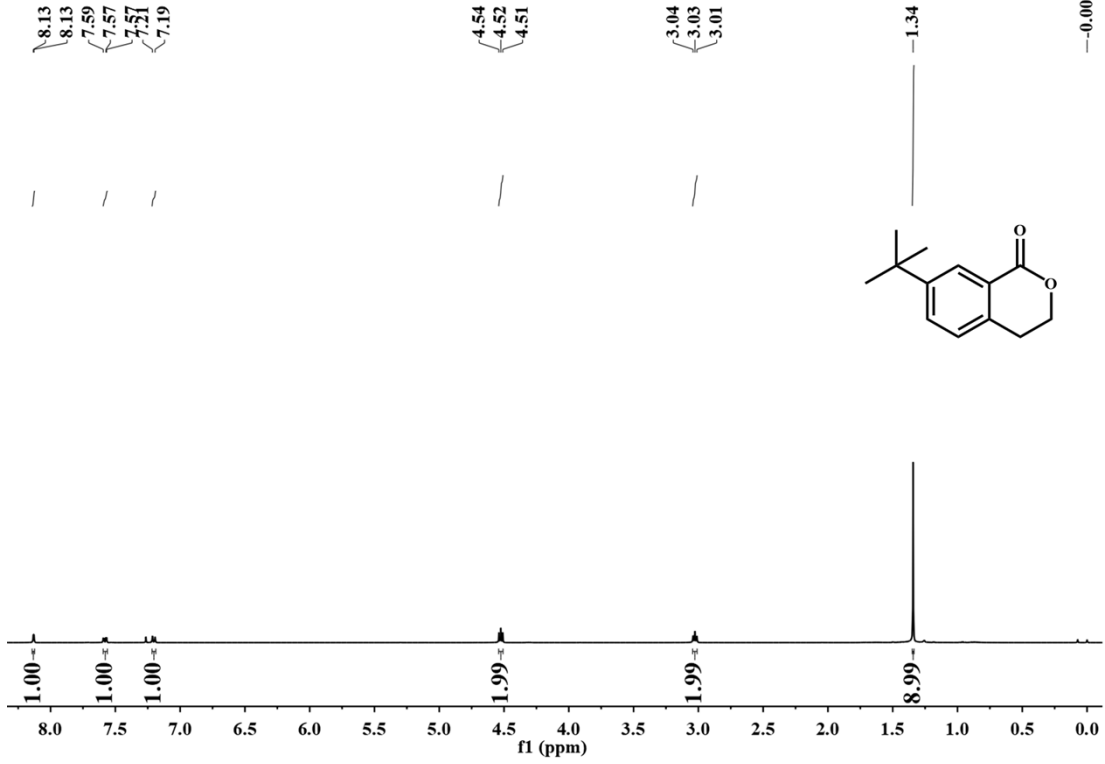

### 4-Methylisochroman-1-one (2j)

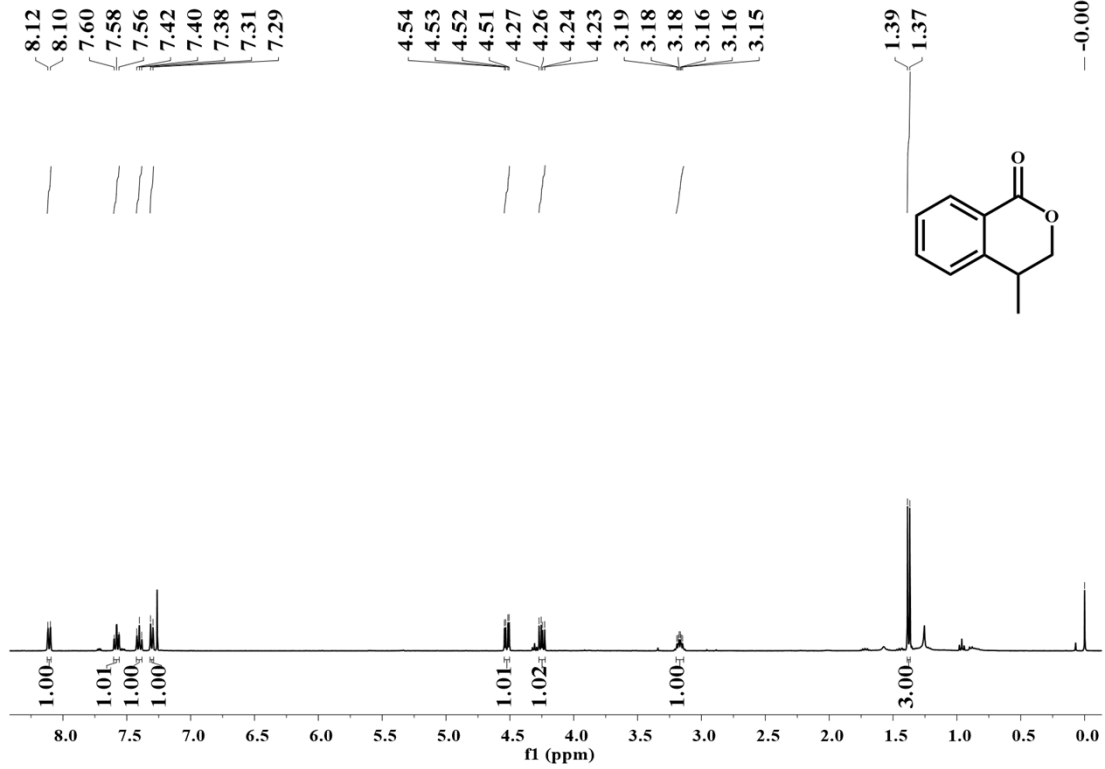



### 8-Methylisochroman-1-one (2k)

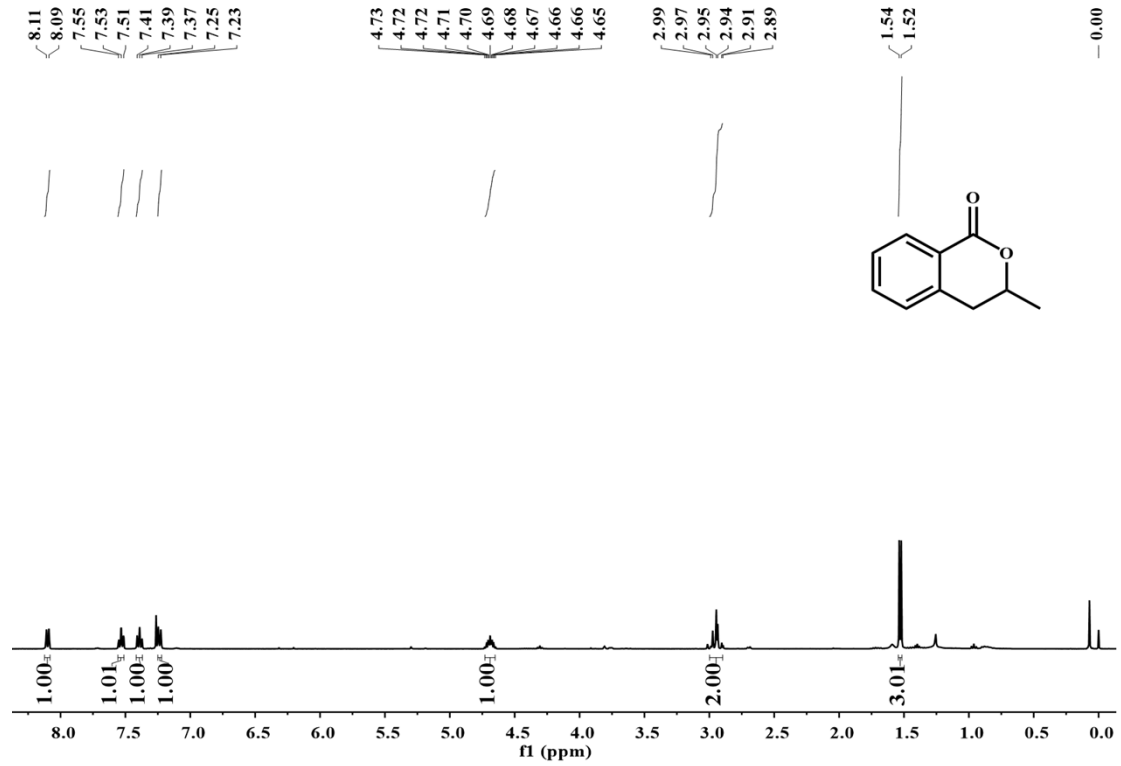

### Isobenzofuran-1(3H)-one (2l)

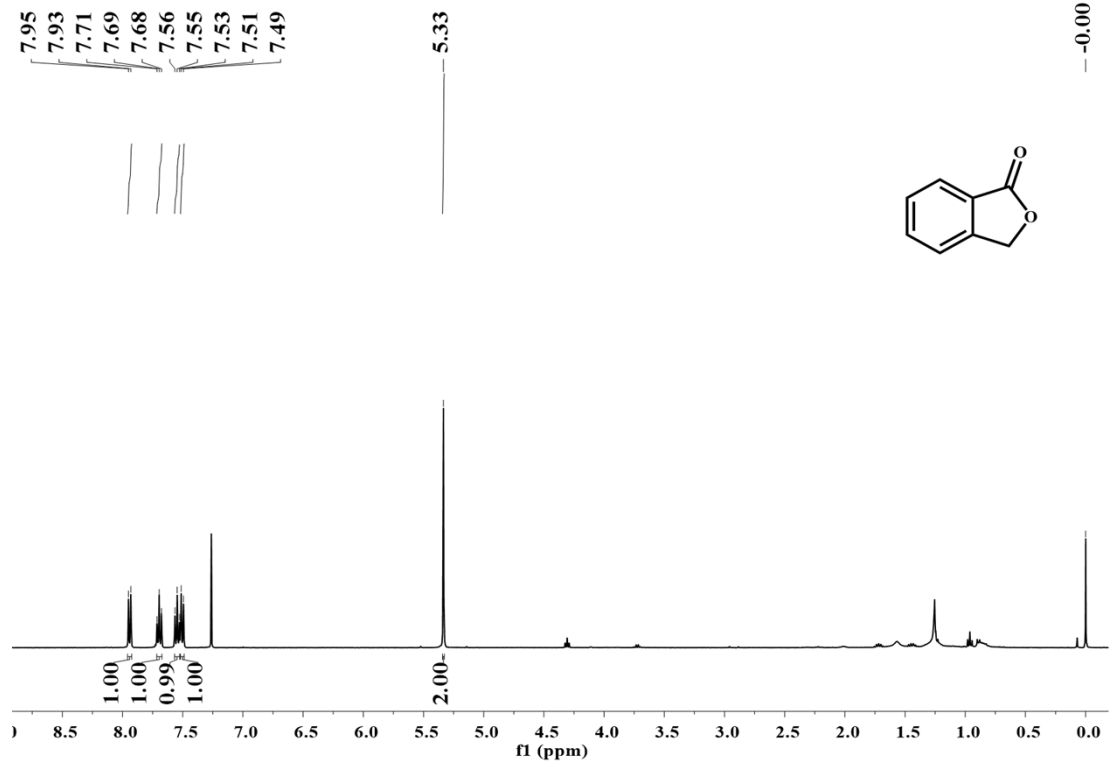

# 1,2-Dihydro-4H-benzo[f]isochromen-4-one (2m)

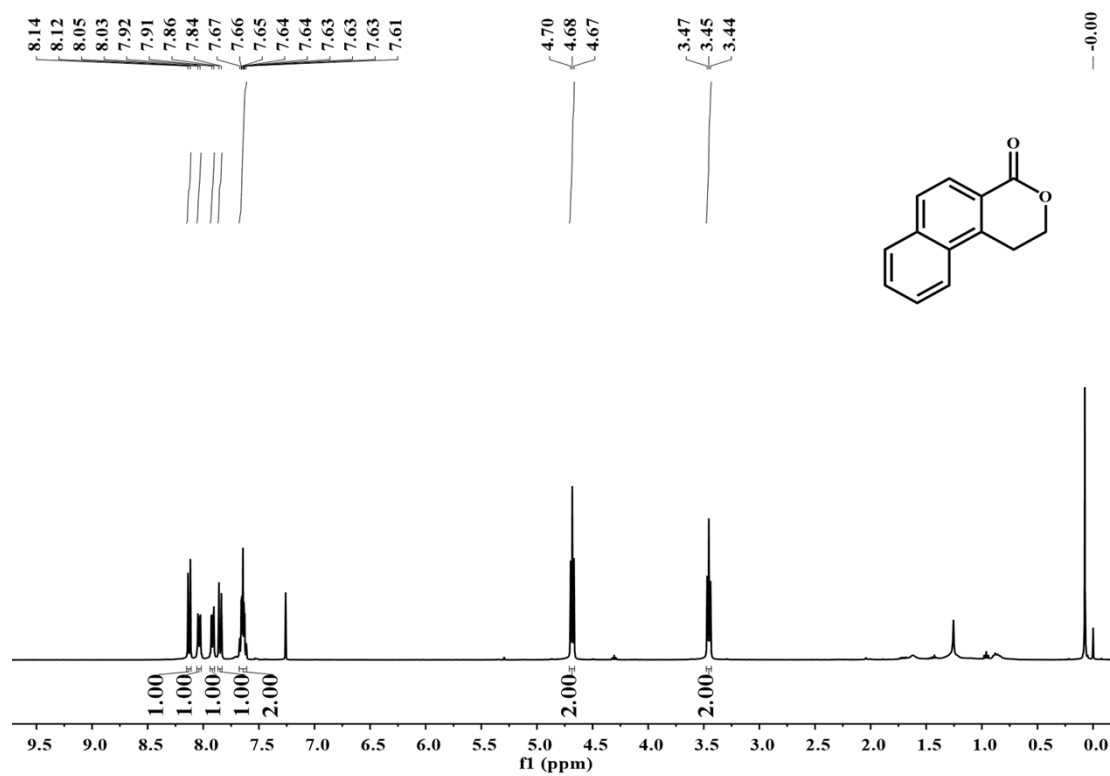

Supplement: d4qi00974f1.pdf [file d4qi00974f1.pdf]
